# Supplementary material for: Human disturbance impacts the integrity of sacred church forests, Ethiopia
Source: PLoS One. 2019 Mar 6;14(3):e0212430. doi: 10.1371/journal.pone.0212430 (PMC6402655; doi:10.1371/journal.pone.0212430)
Supplement: S1 Appendix — Data on sacred church forests include: Woreda, Kebele, size, distance to population center, elevation, the presence of a wall, tree species richness, trees species density, tree biomass, seedling density, seedling richness, and % of disturbance types. (XLSX) [file pone.0212430.s001.xlsx]

## Sheet: Metadata
Elev
1	Montane
2	Upper Montane
Wall
1	No Wall
2	Wall
Distance
1	< 50 km
2	> 50 km

## Sheet: Data
site	latitude	longitude	woreda	kebele	elev12	distance	wall	sizeha	elev	biomassha	abundanceha	rarefied sp richness	%disturbance	%human disturbance	%exotic species	%planted_native taxa	%weedy taxa
1	11.8018	37.5682	Dera	Zara	1	1	2	8.8	1859	258170	37.39	12.74	0.75	0.22	0.2	0	0.58
2	11.7651	37.5487	Dera	Wonchet	1	1	1	7	1897	280053	59.86	12.5	0.56	0.11	0.64	0	0.25
3	11.7462	37.5089	Dera	Koratafisana	1	1	1	7.35	1854	4.69	29.93	14.54	0.57	0.27	0.18	0	0.55
4	11.7465	37.6293	Dera	Gedam Gergera	1	1	2	4.3	1961	89064.2	41.16	13.72	0.75	0.32	0.16	0	0.53
5	11.762	37.597	Dera	Gedam Gergera	1	1	1	2.6	1926	28254	29.23	9.78	0.8	0.17	0.15	0	0.68
6	11.7078	37.6216	Dera	Emashenkor	1	1	2	4.8	2050	163207	36.46	17.53	0.59	0.46	0.42	0	0.12
7	11.8619	37.6677	Fogera	Quhar	1	1	1	4	1833	159427	46.5	7.23	0.87	0.15	0.39	0	0.46
8	11.8504	37.989	Farta	Debre Tabor town	2	1	2	12.3	2524	664075	37.64	16.35	0.13	1	0	0	0
10	11.8606	38.057	Farta	Huletwanomagera	2	1	2	6.04	2628	904568	67.38	17.77	0.29	0.43	0.42	0	0.15
11	11.871	38.0065	Farta	Huletwanomagera	2	1	1	9.1	2642	34361.9	28.9	6.05	0.94	0.27	0.69	0	0.04
12	11.8708	37.9854	Farta	Huletwanomagera	2	1	1	4.5	2563	144114	33.78	11.11	0.77	0.41	0.56	0	0.03
13	11.9044	37.9731	Farta	Kolaydengorsi	2	1	1	6.5	2410	400981	52.77	12.49	0.15	0.98	0.02	0	0
24	11.9123	37.7419	Fogera	Woreta zuria	1	2	1	8	1924	2520.07	16.38	17.03	0.52	0.63	0.09	0	0.28
25	11.9713	37.7697	Fogera	Diba deldalit	1	2	2	3.5	1818	655.42	19.71	7.78	0.77	0.72	0.06	0	0.23
26	11.9831	37.7849	Fogera	Sifrata	1	2	2	3	1857	956.46	22	10.02	0.74	0.67	0.04	0	0.29
27	11.8773	37.6769	Fogera	Quhar	1	2	2	2.5	1833	2477.53	34.8	11.45	0.83	0.58	0.01	0	0.4
28	11.6442	37.9653	Esite	Shemagile Giyorigis	2	1	1	4.6	2416	130	18.7	13.53	0.76	0.89	0.09	0	0.02
29	11.622	37.9581	Esite	Alemaya	2	1	1	15.2	2443	4029.94	22.7	19.8	0.49	0.88	0.07	0	0.05
30	11.5779	38.0065	Esite	Ziguara	2	2	1	2.3	2453	95.82	19.13	11	0.8	0.8	0.17	0	0.03
31	11.5833	38.0222	Esite	Ziguara	2	2	1	4.3	2407	245.96	10.23	9.99	0.77	0.59	0.18	0	0.24
32	11.5614	37.9874	Esite	Gosh Beret/Ziguara	2	2	2	1.7	2692	306.99	23.53	11.31	0.65	0.69	0.15	0	0.15
33	11.6226	38.0553	Esite	Mekane eyesus	2	1	1	2.4	2523	3627.21	49.17	12.29	0.47	0.85	0.05	0	0.09
34	11.683	38.047	Esite	Belita Amijaye	2	2	1	2.1	2693	454.83	28.57	8.32	0.85	0.68	0.18	0	0.14
35	11.6344	37.6852	Dera	Agar Wenidogeti	2	2	1	6.5	2450	10932.4	9.85	9.03	0.78	0.6	0.38	0	0.02
36	11.6549	37.9534	Esite	Recha	2	2	1	6.9	2341	166559	50	14.5	0.36	0.34	0	0	0.66
37	11.9153	38.0067	Farta	Teraroch medhanialme	2	2	2	6.2	2449	41991.7	21.77	10.37	0.69	0.56	0.26	0	0.18
38	11.882	37.9865	Farta	Tseguradiko	2	1	2	4	2606	343676	52.5	16.25	0.31	0.24	0.26	0.39	0.11
39	11.9036	38.0283	Farta	Woybela selamiko	2	2	2	4.4	2549	294090	70.45	14.45	0.65	0.22	0.2	0	0.58
40	11.7837	37.5372	Dera	Wonchet	1	1	2	3	1873	966999	113.33	16.88	0.24	0.16	0.23	0.01	0.6
41	11.8043	37.5354	Dera	Mtslina Tana	1	1	2	2.2	1850	472987	125.91	13.04	0.52	0.13	0	0.08	0.8
42	11.7984	37.4967	Dera	Koratafisana	1	1	2	7.7	1882	628483	49.35	15.44	0.41	0.28	0.03	0.34	0.35
45	11.8868	37.6278	Fogera	Shina	1	2	1	3.3	1800	862577	107.88	9.83	0.82	0.29	0.67	0	0.04
46	11.8911	37.6696	Fogera	Quhar Mikael/ Quhar Abo	1	2	1	9.7	1820	201679	35.57	18.64	0.3	0.56	0.38	0	0.06
50	11.5302	37.9796	Esite	Gota	2	2	1	2.5	2578	1.2926e+06	81.6	12.87	0.21	0.74	0.02	0	0.24
51	11.5383	37.9724	Esite	Gota	2	2	1	5.2	2537	886599	50.96	15.62	0.3	0.43	0.21	0	0.36
52	11.742	37.4644	Dera	Koratafisana	1	2	2	11.8	1836	769601	44.66	17.84	0.35	0.34	0.02	0.2	0.45
54	11.6957	37.5357	Dera	Kulalana Gitiba	1	2	2	2.2	1950	351725	114.09	12.45	0.61	0.12	0.13	0.01	0.74
57	11.8309	37.5559	Dera	Mtslina Tana	1	2	1	2.6	1832	1.113e+06	120	16.29	0.58	0.26	0.06	0.31	0.37
59	11.9441	37.7238	Fogera	Tihua Ena Kokit	1	2	1	2	1887	435330	163.5	8	0.61	0.05	0.1	0	0.86
60	11.8876	37.7016	Fogera	Wereta Zuria	1	1	2	4	1838	586474	105.75	11.04	0.54	0.11	0	0	0.89
61	11.8415	37.6718	Fogera	Bebeks	1	2	2	4	1817	404988	88.75	8.15	0.8	0.08	0	0.21	0.7
62	11.9527	37.9635	Farta	Dengorese	2	2	2	5.4	2412	445594	46.67	15.28	0.32	0.78	0	0.07	0.15
63	11.9054	38.0007	Farta	Buro Teraroch/ Huletwanomagera	2	1	2	2	2475	111359	58	12.99	0.43	0.62	0.04	0	0.34
64	11.8981	38.0066	Farta	Buro Teraroch	2	1	2	1.4	2463	145279	46.43	8.08	0.6	0.44	0.21	0.05	0.31
